# Supplementary material for: Endovascular coiling versus neurosurgical clipping for treatment of ruptured and unruptured intracranial aneurysms during pregnancy and postpartum period
Source: HighWire-hosted journal article supplement (doi:10.1136/neurintsurg-2022-018705), 2022-05-04
Supplement: neurintsurg-2022-018705supp001_data_supplement.pdf [file neurintsurg-2022-018705supp001_data_supplement.pdf]

| <b>Supplementary Table 1. ICD-10 codes used to define the diagnoses and procedures</b> |                                                                                                                                                                                                                                                                              |
|----------------------------------------------------------------------------------------|------------------------------------------------------------------------------------------------------------------------------------------------------------------------------------------------------------------------------------------------------------------------------|
| <b>Diagnosis/ Procedure</b>                                                            | <b>ICD-10 code</b>                                                                                                                                                                                                                                                           |
| Antepartum                                                                             | O09, O10, O11, O12, O13, O14, O15, O16, O20, O21, O22, O23, O24, O25, O26, O28, O29, O30, O31, O32, O33, O34, O35, O36, O40, O41, O42, O43, O44, O45, O46, O47, O48, Z331, Z333, Z34, Z36, Z3A                                                                               |
| Labor and delivery                                                                     | O60, O61, O62, O63, O64, O65, O66, O67, O68, O69, O70, O71, O72, O73, O74, O75, O76, O77, O80, O82, Z37, Z38                                                                                                                                                                 |
| Postpartum                                                                             | O85, O87, O88, O89, O90, O91, O92, Z39                                                                                                                                                                                                                                       |
| Unclassified pregnancy codes                                                           | O94, O98, O99, O9A                                                                                                                                                                                                                                                           |
| Non-traumatic subarachnoid hemorrhage                                                  | I60.x                                                                                                                                                                                                                                                                        |
| Traumatic subarachnoid hemorrhage                                                      | S06.6x                                                                                                                                                                                                                                                                       |
| Arteriovenous malformation                                                             | Q28.2, Q28.3                                                                                                                                                                                                                                                                 |
| Cerebral angiitis                                                                      | I68.2, I67.7                                                                                                                                                                                                                                                                 |
| Neurosurgical clipping                                                                 | 03VG0CZ, 03VG0DZ, 03VG0ZZ, 03VL0CZ, 03VL0DZ, 03VL0ZZ, 03VK0CZ, 03VK0DZ, 03VK0ZZ, 03VPOCZ, 03VP0DZ, 03VP0ZZ, 03VQ0CZ, 03VQ0DZ, 03VQ0ZZ, 03LG0CZ, 03LG0DZ, 03LG0ZZ, 03LL0CZ, 03LL0DZ, 03LL0ZZ, 03LK0CZ, 03LK0DZ, 03LK0ZZ, 03LP0CZ, 03LP0DZ, 03LP0ZZ, 03LQ0CZ, 03LQ0DZ, 03LQ0ZZ |
| Endovascular coiling                                                                   | 03VG3DZ, 03VG3ZZ, 03VK3DZ, 03VK3ZZ, 03VL3DZ, 03VL3ZZ, 03VP3DZ, 03VP3ZZ, 03VQ3DZ, 03VQ3ZZ, 03LG3DZ, 03LG3ZZ, 03LK3DZ, 03LK3ZZ, 03LL3DZ, 03LL3ZZ, 03LP3DZ, 03LP3ZZ, 03LQ3DZ, 03LQ3ZZ                                                                                           |
| Coma                                                                                   | R40.2, R40.3                                                                                                                                                                                                                                                                 |
| Hydrocephalus                                                                          | G91.0 G91.1                                                                                                                                                                                                                                                                  |
| Intraparenchymal hemorrhage                                                            | I61.x                                                                                                                                                                                                                                                                        |
| Cerebral edema                                                                         | G93.6                                                                                                                                                                                                                                                                        |
| Cerebral herniation                                                                    | G93.5                                                                                                                                                                                                                                                                        |
| Ventriculostomy                                                                        | 009600Z, 009630Z, 009640Z                                                                                                                                                                                                                                                    |
| Ischemic stroke                                                                        | I63.x, I67.81, I67.82, I67.89                                                                                                                                                                                                                                                |
| Prolonged intubation                                                                   | 5A1945Z, 5A1955Z                                                                                                                                                                                                                                                             |
| Ventriculostomy                                                                        | 009600Z, 009630Z, 009640Z                                                                                                                                                                                                                                                    |
| Acute kidney injury                                                                    | N17.x                                                                                                                                                                                                                                                                        |
| Gastrostomy tube placement                                                             | 0DH63UZ, 0DH64UZ                                                                                                                                                                                                                                                             |
| Tracheostomy                                                                           | 0B110F4, 0B113F4                                                                                                                                                                                                                                                             |
| Infectious complications                                                               | N300, T8351XA, J13, J14, J15, J16, J17, J18, G00, G01, G03, G04, G05, G06, G07, B95, B96, R7881, T814XXA, K6811, A41, A40, R652                                                                                                                                              |
